# Supplementary material
Source: PubMed Central journal article supplement (PMC2650300)
Supplement: 0812892106_0812892106SI.pdf [file 0812892106_0812892106SI.pdf]

# Supporting Information

Merbl and Kirschner 10.1073/pnas.0812892106

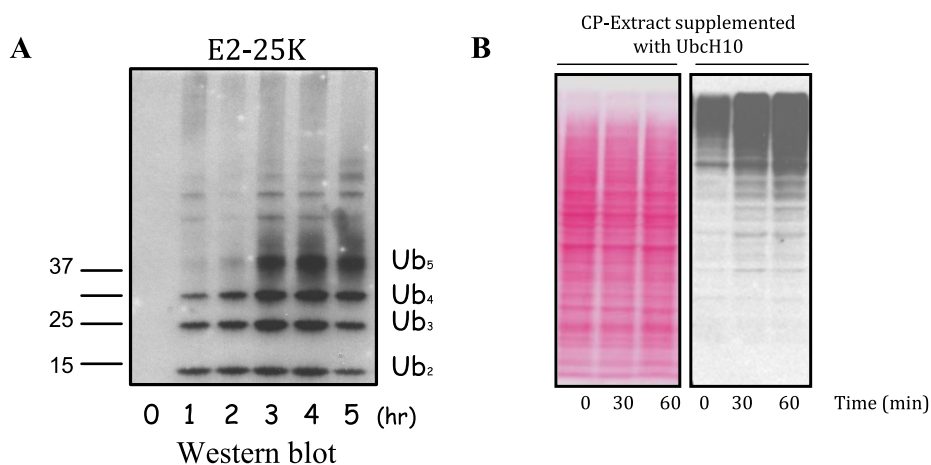

**Fig. S1.** Testing the FK1 antibody. (A) It was previously reported that E2-25K can generate polyubiquitin chains without E3 [Chen Z, Pickart CM (1990) A 25-kilodalton ubiquitin carrier protein (E2) catalyzes multi-ubiquitin chain synthesis via lysine 48 of ubiquitin. *J Biol Chem* 265:21835–21842]. We therefore tested the ability of the antibody to detect increasing levels of polyubiquitin chains. E2-25K-conjugated Ub-chain synthesis was performed in vitro at 37 °C and the reaction was stopped at the indicated time points by the addition of sample buffer. Products were analyzed by SDS/PAGE gel electrophoresis. FK1 (Biomol) antibody was then used to blot for the polyubiquitin chains. (B) CP-extracts were supplemented with UbcH10, and the reaction was stopped at the indicated time points to follow the change in the global ubiquitination signal in the extract as a function of time.

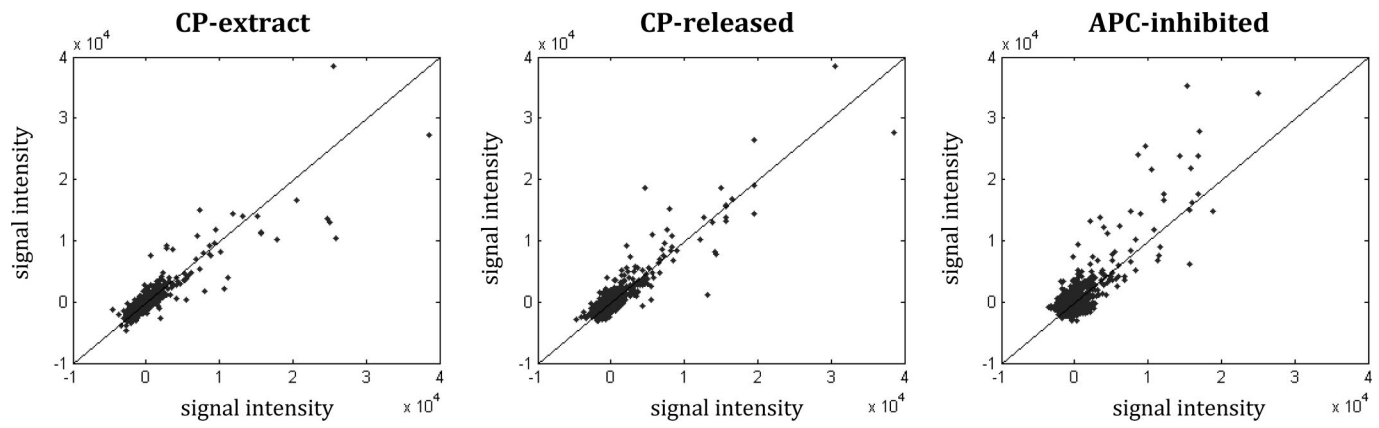

**Fig. S2.** Reproducibility of the assay. Signal intensity of each protein was calculated by taking the average of its spots reactivities (signal intensity minus background value). The signal intensity of each protein was then plotted and compared between 2 replicate microarrays. The biological replicates of 3 different conditions (6 chips in total) are shown (CP-extract, CP-released, and APC-inhibited).

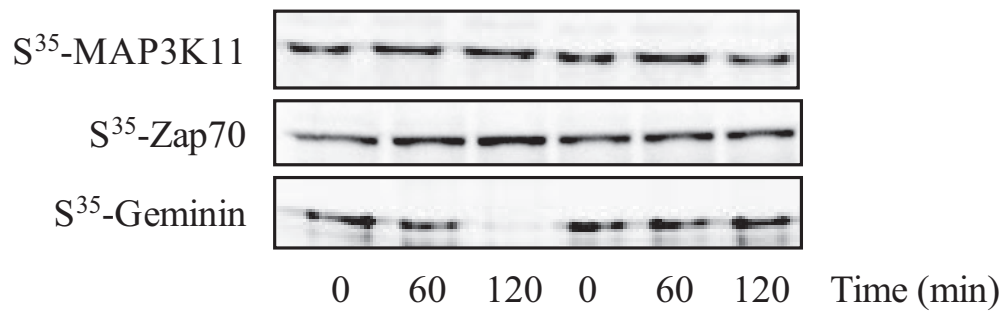

**Fig. S3.** S<sup>35</sup>-labeled MAP3K11 and Zap70 proteins and the positive control Geminin were added to CP-synchronized HeLa S3 extracts with and without the addition of the APC-inhibitor emi1. Reactions were stopped at 0, 60, and 120 min and analyzed by SDS/PAGE (4–15%) and autoradiography.

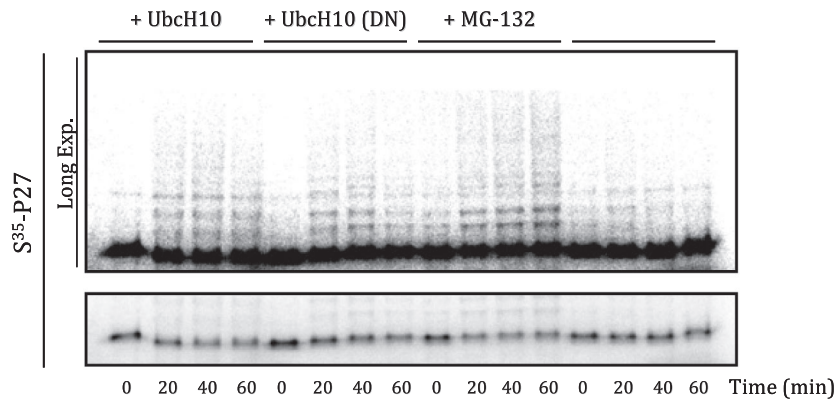

**Fig. S4.** Full gel of Fig. 3C.  $S^{35}$ -labeled p27 was added to CP-synchronized HeLa S3 extracts with the addition of UbcH10 ( $1 \mu\text{L}$ ;  $1 \text{ mg/mL}$ ), a dominant-negative UbcH10 (UbcH10-DN;  $1 \mu\text{L}$ ,  $1 \text{ mg/mL}$ ), UbcH10 and MG-132 ( $200 \mu\text{M}$ ), or UbcH10 and Emi1 ( $5 \text{ mg/mL}$ ). UbcH10-DN, the catalytically inactive mutant UbcH10<sup>C114S</sup>, was previously shown to inhibit APC-dependent ubiquitination *in vitro*. In this experiment, UbcH10-DN failed to inhibit p27 ubiquitination, suggesting that there might be different E2 or E3 enzymes that are involved in its ubiquitination.

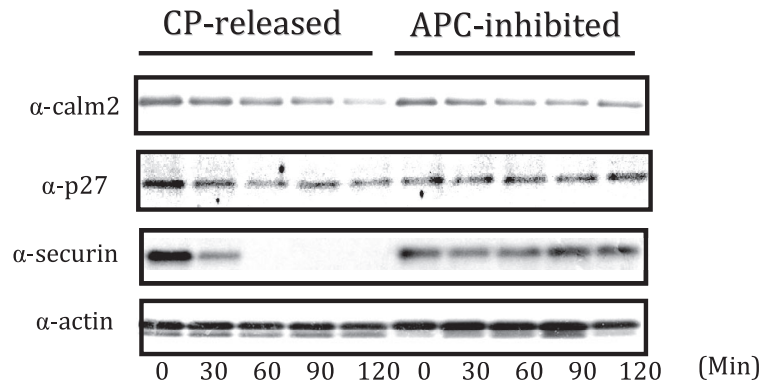

**Fig. S5.** Degradation assay of endogenous calmodulin and p27 proteins. Degradation of endogenous proteins (calmodulin, p27, and securin) in the CP-released and APC-inhibited extracts was detected by western blotting using the indicated primary antibodies. Actin was used as a loading control (securin, MBL; calmodulin, Upstate; p27, Upstate; actin, Sigma). Shown below is the time of incubation.

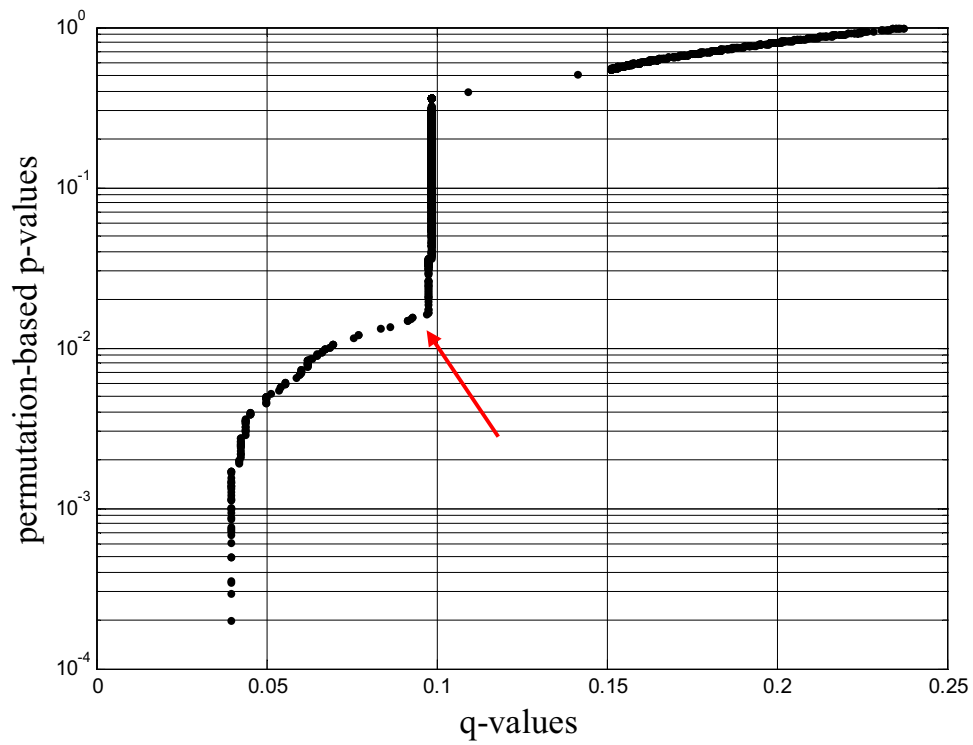

**Fig. S6.** Setting a threshold for controlling the FDR. For each of the proteins on the array, the permutation-based  $P$  value was plotted as a function of the protein's  $q$ -value. The red arrow depicts the threshold  $q$ -value we chose to determine which proteins were differentially modified ( $q < 0.096$ ).

**Table S1. A list of differentially modified proteins between CP-released and APC-inhibited extracts**

| Name                                                                                                            | Protein ID     | P     | q     | pFDR value |
|-----------------------------------------------------------------------------------------------------------------|----------------|-------|-------|------------|
| additional sex combs like 1 ( <i>Drosophila</i> )                                                               | BC064984.1     | 0.001 | 0.040 | 0.048      |
| ADP-ribosylation factor-like 7 (ARL7)                                                                           | NM.005737.3    | 0.002 | 0.042 | 0.043      |
| ADP-ribosylation-like factor 6 interacting protein 4 (ARL6IP4)                                                  | NM.016638.1    | 0.005 | 0.050 | 0.051      |
| anaplastic lymphoma kinase ( $K_i$ -1) (ALK)                                                                    | NM.004304.3    | 0.013 | 0.083 | 0.083      |
| ankyrin repeat domain 13                                                                                        | BC032833.2     | 0.000 | 0.040 | 0.067      |
| arrestin domain containing 3 (ARRDC3)                                                                           | NM.020801.1    | 0.006 | 0.054 | 0.055      |
| aurora kinase A (AURKA),                                                                                        | NM.003600.2    | 0.001 | 0.040 | 0.060      |
| aurora kinase B (AURKB)                                                                                         | NM.004217.2    | 0.001 | 0.040 | 0.044      |
| aurora kinase C (AURKC),                                                                                        | NM.001015878.1 | 0.007 | 0.060 | 0.061      |
| B lymphoid tyrosine kinase (BLK)                                                                                | NM.001715.2    | 0.008 | 0.062 | 0.063      |
| baculoviral IAP repeat-containing 4 (BIRC4)                                                                     | NM.001167.2    | 0.015 | 0.091 | 0.092      |
| calcium binding protein 4                                                                                       | BC033167.1     | 0.008 | 0.062 | 0.062      |
| calcium/calmodulin-dependent protein kinase (CaM kinase) II beta (CAMK2B)                                       | NM.001220.3    | 0.009 | 0.063 | 0.063      |
| calcium/calmodulin-dependent protein kinase IV (CAMK4)                                                          | NM.001744.2    | 0.006 | 0.055 | 0.056      |
| Calmodulin (from <i>Saccharomyces cerevisiae</i> , CALM2 homolog*)                                              | NM.001743*     | 0.006 | 0.055 | 0.056      |
| casein kinase 1, alpha 1 (CSNK1A1),                                                                             | NM.001025105.1 | 0.003 | 0.044 | 0.045      |
| cDNA clone MGC:3432                                                                                             | BC013957.1     | 0.004 | 0.045 | 0.046      |
| cDNA clone MGC:39273                                                                                            | BC024289.1     | 0.001 | 0.040 | 0.046      |
| chromosome 16 open reading frame 5                                                                              | BC002882.1     | 0.003 | 0.042 | 0.042      |
| chromosome 19 open reading frame 28 (C19orf28)                                                                  | NM.174983.2    | 0.008 | 0.062 | 0.062      |
| chromosome 6 open reading frame 145 (C6orf145)                                                                  | NM.183373.2    | 0.002 | 0.042 | 0.044      |
| chromosome 6 open reading frame 201 (C6orf201)                                                                  | NM.206834.1    | 0.006 | 0.055 | 0.056      |
| chromosome 7 open reading frame 2 (C7orf2)                                                                      | NM.022458.2    | 0.003 | 0.044 | 0.044      |
| chromosome 9 open reading frame 43 (C9orf43)                                                                    | NM.152786.1    | 0.010 | 0.067 | 0.067      |
| conserved helix-loop-helix ubiquitous kinase (CHUK)                                                             | NM.001278.3    | 0.007 | 0.060 | 0.061      |
| cullin 3 (CUL3)                                                                                                 | NM.003590.2    | 0.007 | 0.060 | 0.060      |
| cyclin G2                                                                                                       | BC032518.1     | 0.007 | 0.060 | 0.060      |
| cyclin-dependent kinase inhibitor 1B (p27, Kip1) (CDKN1B)                                                       | NM.004064.2    | 0.006 | 0.054 | 0.054      |
| cytochrome P450, family 26, subfamily A, polypeptide 1 (CYP26A1),                                               | NM.057157.1    | 0.001 | 0.040 | 0.053      |
| dendritic cell-derived ubiquitin-like protein (DC-Ubp)                                                          | NM.152277.1    | 0.004 | 0.045 | 0.047      |
| dexamethasone-induced (DEXI)                                                                                    | NM.014015.3    | 0.012 | 0.077 | 0.077      |
| DNA fragmentation factor, 40kDa, beta polypeptide (caspase-activated DNase) (DFFB),                             | NM.001004285.1 | 0.004 | 0.044 | 0.044      |
| DnaJ (Hsp40) homolog, subfamily B, member 12 (DNAJB12),                                                         | NM.001002762.1 | 0.004 | 0.045 | 0.046      |
| DnaJ (Hsp40) homolog, subfamily B, member 6,                                                                    | BC000177.2     | 0.008 | 0.062 | 0.062      |
| dolichyl-phosphate mannosyltransferase polypeptide 2, regulatory subunit (DPM2),                                | NM.152690.1    | 0.001 | 0.040 | 0.055      |
| dual-specificity tyrosine-(Y)-phosphorylation regulated kinase 3 (DYRK3),                                       | NM.001004023.1 | 0.007 | 0.060 | 0.061      |
| EGF-like repeats and discoidin I-like domains 3                                                                 | BC053656.1     | 0.002 | 0.040 | 0.041      |
| ems1 sequence, mammary tumor and squamous cell carcinoma-associated (EMS1),                                     | NM.138565.1    | 0.001 | 0.040 | 0.052      |
| EPH receptor A8 (EPHA8),                                                                                        | NM.001006943.1 | 0.010 | 0.068 | 0.068      |
| EphA4 (EPHA4)                                                                                                   | NM.004438.1    | 0.009 | 0.066 | 0.066      |
| erythrocyte membrane protein band 4.1 like 5                                                                    | BC054508.1     | 0.000 | 0.040 | 0.093      |
| eukaryotic translation initiation factor 1A, X-linked (EIF1AX)                                                  | NM.001412.2    | 0.011 | 0.069 | 0.069      |
| expressed in T-cells and eosinophils in atopic dermatitis (ETEA)                                                | NM.014613.1    | 0.003 | 0.044 | 0.045      |
| farnesyl-diphosphate farnesyltransferase 1                                                                      | BC003573.1     | 0.015 | 0.092 | 0.092      |
| feline sarcoma oncogene (FES)                                                                                   | NM.002005.2    | 0.002 | 0.040 | 0.040      |
| fibroblast growth factor receptor 4 (FGFR4),                                                                    | NM.002011.3    | 0.015 | 0.093 | 0.093      |
| fms-related tyrosine kinase 1 (vascular endothelial growth factor/vascular permeability factor receptor) (FLT1) | NM.002019.1    | 0.012 | 0.076 | 0.076      |
| G protein-coupled receptor kinase 4 (GRK4),                                                                     | NM.001004056.1 | 0.003 | 0.043 | 0.043      |

| Name                                                                                     | Protein ID     | <i>P</i> | <i>q</i> | pFDR value |
|------------------------------------------------------------------------------------------|----------------|----------|----------|------------|
| hepatocyte growth factor-regulated tyrosine kinase substrate (HGS)                       | NM.004712.3    | 0.008    | 0.062    | 0.063      |
| HTGN29 protein (HTGN29)                                                                  | NM.020199.1    | 0.000    | 0.040    | 0.080      |
| hypothetical gene LOC128439 (LOC128439)                                                  | NM.139016.2    | 0.003    | 0.044    | 0.045      |
| hypothetical protein DKFZp762O076 (DKFZp762O076)                                         | NM.018710.1    | 0.001    | 0.040    | 0.042      |
| hypothetical protein FLJ10156                                                            | BC005004.1     | 0.005    | 0.050    | 0.052      |
| hypothetical protein FLJ11184                                                            | BC011842.2     | 0.001    | 0.040    | 0.070      |
| hypothetical protein FLJ11749 (FLJ11749)                                                 | NM.024591.1    | 0.011    | 0.069    | 0.070      |
| hypothetical protein FLJ36175                                                            | BC029520.1     | 0.001    | 0.040    | 0.040      |
| hypothetical protein FLJ38628 (FLJ38628)                                                 | NM.152267.2    | 0.007    | 0.058    | 0.058      |
| hypothetical protein LOC143458 (LOC143458)                                               | NM.174902.2    | 0.001    | 0.040    | 0.044      |
| hypothetical protein LOC255330                                                           | BC042038.1     | 0.009    | 0.065    | 0.065      |
| hypothetical protein MGC11257 (MGC11257)                                                 | NM.032350.3    | 0.003    | 0.044    | 0.045      |
| hypothetical protein MGC17403 (MGC17403)                                                 | NM.152634.1    | 0.004    | 0.044    | 0.045      |
| hypothetical protein MGC40579 (MGC40579)                                                 | NM.152776.1    | 0.008    | 0.062    | 0.064      |
| hypothetical protein MGC4618 (MGC4618)                                                   | NM.032326.1    | 0.002    | 0.040    | 0.042      |
| hypothetical protein MGC51025 (MGC51025)                                                 | NM.178571.2    | 0.010    | 0.067    | 0.068      |
| immediate early response 3 (IER3),                                                       | NM.003897.2    | 0.002    | 0.042    | 0.042      |
| immunoglobulin heavy constant gamma 1 (G1m marker)                                       | BC014667.1     | 0.002    | 0.042    | 0.043      |
| immunoglobulin heavy constant gamma 1 (G1m marker)                                       | BC019337.1     | 0.015    | 0.091    | 0.091      |
| insulin-like growth factor 1 receptor (IGF1R)                                            | NM.000875.2    | 0.003    | 0.042    | 0.042      |
| integral membrane protein 2C                                                             | BC002424.1     | 0.012    | 0.077    | 0.077      |
| interferon stimulated gene 20kDa (ISG20)                                                 | NM.002201.3    | 0.003    | 0.042    | 0.042      |
| interleukin 17E (IL17E),                                                                 | NM.022789.2    | 0.005    | 0.050    | 0.052      |
| KIAA0157 protein (KIAA0157)                                                              | NM.032182.2    | 0.001    | 0.040    | 0.051      |
| KIAA1458 protein                                                                         | BC031691.2     | 0.005    | 0.050    | 0.051      |
| likely ortholog of mouse gene trap locus 3 (GTL3)                                        | NM.013242.1    | 0.002    | 0.042    | 0.042      |
| low density lipoprotein receptor-related protein 10 (LRP10)                              | NM.014045.1    | 0.005    | 0.053    | 0.053      |
| lymphocyte-specific protein tyrosine kinase (LCK),                                       | NM.001042771.1 | 0.015    | 0.091    | 0.092      |
| lysosomal-associated protein transmembrane 4 alpha (LAPTM4A)                             | NM.014713.2    | 0.005    | 0.050    | 0.050      |
| MAX interacting protein 1 (MXI1),                                                        | NM.130439.1    | 0.001    | 0.040    | 0.044      |
| megakaryocyte-associated tyrosine kinase (MATK),                                         | NM.002378.3    | 0.016    | 0.093    | 0.093      |
| melanoma antigen, family B, 1 (MAGEB1)                                                   | NM.002363.1    | 0.009    | 0.065    | 0.065      |
| mitogen-activated protein kinase kinase 11 (MAP3K11)                                     | NM.002419.2    | 0.003    | 0.044    | 0.044      |
| mRNA similar to hypothetical protein FLJ25555                                            | BC044239.1     | 0.005    | 0.050    | 0.051      |
| Nedd4 family interacting protein 1 (NDFIP1)                                              | NM.030571.2    | 0.001    | 0.040    | 0.040      |
| Nedd4 family interacting protein 2                                                       | BC021988.1     | 0.010    | 0.068    | 0.068      |
| neural precursor cell expressed, developmentally down-regulated 8 (NEDD8)                | NM.006156.1    | 0.001    | 0.040    | 0.044      |
| neurotrophic tyrosine kinase, receptor, type 1 (NTRK1),                                  | NM.001007792.1 | 0.002    | 0.042    | 0.044      |
| N-glycanase 1 (NGLY1)                                                                    | NM.018297.2    | 0.004    | 0.044    | 0.045      |
| NIMA (never in mitosis gene a)- related kinase 9 (NEK9)                                  | NM.033116.2    | 0.008    | 0.062    | 0.063      |
| p53-regulated DDA3 (DDA3)                                                                | NM.032636.2    | 0.006    | 0.055    | 0.056      |
| PAS domain containing serine/threonine kinase (PASK)                                     | NM.015148.1    | 0.001    | 0.040    | 0.048      |
| PCTAIRE protein kinase 2                                                                 | BC033005.1     | 0.001    | 0.040    | 0.064      |
| pleckstrin homology domain containing, family G, member 5 (PLEKHG5),                     | NM.020631.2    | 0.002    | 0.042    | 0.043      |
| potassium voltage-gated channel, shaker-related subfamily, beta member 2 (KCNA2)         | NM.003636.1    | 0.002    | 0.042    | 0.042      |
| PREDICTED                                                                                | XM.378350.2    | 0.005    | 0.051    | 0.051      |
| PREDICTED                                                                                | XM.373800.2    | 0.010    | 0.067    | 0.067      |
| proteasome (prosome, macropain) 26S subunit, non-ATPase, 4 (PSMD4)                       | NM.002810.1    | 0.001    | 0.040    | 0.045      |
| proteasome (prosome, macropain) 26S subunit, non-ATPase, 4 (PSMD4), T2                   | NM.153822.1    | 0.002    | 0.042    | 0.043      |
| RAS-like, family 10, member B                                                            | BC041133.1     | 0.003    | 0.044    | 0.044      |
| regenerating islet-derived 1 alpha (pancreatic stone protein, pancreatic thread protein) | BC005350.1     | 0.008    | 0.062    | 0.062      |
| ribosomal protein L30 (RPL30)                                                            | NM.000989.2    | 0.002    | 0.040    | 0.041      |
| ribosomal protein S6 kinase, 90kDa, polypeptide 4 (RPS6KA4),                             | NM.001006944.1 | 0.001    | 0.040    | 0.070      |
| ring finger protein 111                                                                  | BC060862.1     | 0.001    | 0.040    | 0.050      |



| Name                                                                                                             | Protein ID  | <i>P</i> | <i>q</i> | pFDR value |
|------------------------------------------------------------------------------------------------------------------|-------------|----------|----------|------------|
| ring finger protein 111                                                                                          | BC010369.1  | 0.003    | 0.042    | 0.042      |
| ring finger protein 128 (RNF128),                                                                                | NM_194463.1 | 0.000    | 0.040    | 0.120      |
| ring finger protein 4 (RNF4)                                                                                     | NM_002938.2 | 0.002    | 0.042    | 0.042      |
| secretory carrier membrane protein 3 (SCAMP3),                                                                   | NM_005698.2 | 0.009    | 0.065    | 0.065      |
| selectin ligand interactor cytoplasmic-1 (SLIC1),                                                                | NM_153337.1 | 0.001    | 0.040    | 0.045      |
| serum/glucocorticoid regulated kinase (SGK)                                                                      | NM_005627.1 | 0.005    | 0.050    | 0.051      |
| signal recognition particle 19kDa                                                                                | BC010947.1  | 0.004    | 0.044    | 0.044      |
| Sjogren syndrome antigen A1 (52kDa, ribonucleoprotein autoantigen SS-A/Ro) (SSA1)                                | NM_003141.2 | 0.003    | 0.042    | 0.043      |
| SMT3 suppressor of mif two 3 homolog 1 (yeast) (SUMO1),                                                          | NM_003352.4 | 0.004    | 0.045    | 0.045      |
| solute carrier family 1 (neuronal/epithelial high affinity glutamate transporter, system Xag), member 1 (SLC1A1) | NM_004170.2 | 0.008    | 0.062    | 0.062      |
| solute carrier family 23 (nucleobase transporters), member 2                                                     | BC013112.2  | 0.001    | 0.040    | 0.051      |
| solute carrier family 36 (proton/amino acid symporter), member 4                                                 | BC047374.1  | 0.004    | 0.045    | 0.046      |
| solute carrier family 6 (neurotransmitter transporter), member 15                                                | BC022253.1  | 0.005    | 0.050    | 0.050      |
| src homology three (SH3) and cysteine rich domain TANK-binding kinase 1 (TBK1)                                   | BC020221.1  | 0.001    | 0.040    | 0.042      |
| tec protein tyrosine kinase (TEC)                                                                                | NM_013254.2 | 0.003    | 0.042    | 0.043      |
| tec protein tyrosine kinase (TEC)                                                                                | NM_003215.1 | 0.009    | 0.066    | 0.066      |
| thousand and one amino acid protein kinase (TAO1)                                                                | NM_004783.1 | 0.005    | 0.050    | 0.051      |
| tripartite motif-containing 52 (TRIM52)                                                                          | NM_032765.1 | 0.006    | 0.055    | 0.055      |
| ubiquitin-activating enzyme E1-like (UBE1L)                                                                      | NM_003335.2 | 0.008    | 0.062    | 0.063      |
| ubiquitin-conjugating enzyme E2-like vasopressin-induced                                                         | BC064566.1  | 0.009    | 0.063    | 0.063      |
| vasopressin-induced                                                                                              | BC000877.1  | 0.007    | 0.059    | 0.060      |
| WD repeat domain 45 (WDR45),                                                                                     | NM_007075.3 | 0.003    | 0.042    | 0.043      |
| YY1 ion factor (YY1)                                                                                             | NM_003403.3 | 0.001    | 0.040    | 0.046      |
| zeta-chain (TCR) associated protein kinase 70kDa (ZAP70),                                                        | NM_001079.3 | 0.002    | 0.040    | 0.042      |
| zeta-chain (TCR) associated protein kinase 70kDa,                                                                | BC053878.1  | 0.003    | 0.044    | 0.045      |
| zinc finger protein 313 (ZNF313)                                                                                 | NM_018683.2 | 0.005    | 0.050    | 0.050      |
| BC013173 Homo sapiens, clone MGC:17340                                                                           | BC013173.1  | 0.000    | 0.040    | 0.072      |
| BC015219 , HBV associated factor, clone MGC:17759                                                                | BC015219.1  | 0.014    | 0.086    | 0.086      |
| BC015569 , Similar to SRp25 nuclear protein, clone MGC:22989                                                     | BC015569.1  | 0.006    | 0.055    | 0.056      |
| BC018953 , SWI/SNF related, matrix associated, actin dependent regulator of chromatin, subfamily d, member 2     | BC018953.1  | 0.008    | 0.062    | 0.062      |

Protein reactivities of two microarrays in each condition were compared using two-sided t-test. Permutation-based *P* values were calculated and the false discovery rate was calculated for each gene based on Storey's *q* values estimation (see materials and methods). Differentially modified proteins (*q* value < 0.096) were alphabetically sorted.

**Table S2. A full summary of the “functional annotation clustering” tool analysis**

| Category           | Term                                                                        | Count      | %     | <i>P</i> | List Total | Fold Enrichment | Benjamini | FDR      |
|--------------------|-----------------------------------------------------------------------------|------------|-------|----------|------------|-----------------|-----------|----------|
| Functional Group 1 | Median: 2.4538434663258228E-5                                               | Geo:2.6E-5 |       |          |            |                 |           |          |
| GOTERM_BP_ALL      | GO:0043687~post-translational protein modification                          | 39         | 31.97 | 0.00     | 91         | 2.83            | 1.60E-06  | 7.46E-07 |
| GOTERM_BP_ALL      | GO:0006468~protein amino acid phosphorylation                               | 29         | 23.77 | 0.00     | 91         | 3.75            | 9.76E-07  | 9.09E-07 |
| GOTERM_BP_ALL      | GO:0016310~phosphorylation                                                  | 30         | 24.59 | 0.00     | 91         | 3.39            | 3.05E-06  | 4.26E-06 |
| GOTERM_BP_ALL      | GO:0006464~protein modification process                                     | 40         | 32.79 | 0.00     | 91         | 2.54            | 5.21E-06  | 9.71E-06 |
| GOTERM_BP_ALL      | GO:0043412~biopolymer modification                                          | 40         | 32.79 | 0.00     | 91         | 2.46            | 1.06E-05  | 2.47E-05 |
| GOTERM_BP_ALL      | GO:0006793~phosphorus metabolic process                                     | 30         | 24.59 | 0.00     | 91         | 2.97            | 2.77E-05  | 9.05E-05 |
| GOTERM_BP_ALL      | GO:0006796~phosphate metabolic process                                      | 30         | 24.59 | 0.00     | 91         | 2.97            | 2.77E-05  | 9.05E-05 |
| GOTERM_BP_ALL      | GO:0044267~cellular protein metabolic process                               | 46         | 37.70 | 0.00     | 91         | 1.77            | 0.0058201 | 0.021755 |
| GOTERM_BP_ALL      | GO:0044260~cellular macromolecule metabolic process                         | 46         | 37.70 | 0.00     | 91         | 1.75            | 0.0076647 | 0.03226  |
| GOTERM_BP_ALL      | GO:0019538~protein metabolic process                                        | 47         | 38.52 | 0.00     | 91         | 1.71            | 0.0097359 | 0.045575 |
| GOTERM_BP_ALL      | GO:0007154~cell communication                                               | 40         | 32.79 | 0.00     | 91         | 1.57            | 0.3091181 | 2.04634  |
| GOTERM_BP_ALL      | GO:0007165~signal transduction                                              | 37         | 30.33 | 0.00     | 91         | 1.60            | 0.3798054 | 2.852187 |
| GOTERM_BP_ALL      | GO:0007242~intracellular signaling cascade                                  | 23         | 18.85 | 0.00     | 91         | 1.94            | 0.4641607 | 3.988206 |
| GOTERM_BP_ALL      | GO:0043283~biopolymer metabolic process                                     | 49         | 40.16 | 0.00     | 91         | 1.40            | 0.52255   | 5.035767 |
| GOTERM_BP_ALL      | GO:0043170~macromolecule metabolic process                                  | 56         | 45.90 | 0.04     | 91         | 1.20            | 0.9974465 | 52.81438 |
| GOTERM_BP_ALL      | GO:0009987~cellular process                                                 | 83         | 68.03 | 0.17     | 91         | 1.05            | 0.9999999 | 96.8274  |
| GOTERM_BP_ALL      | GO:0044238~primary metabolic process                                        | 59         | 48.36 | 0.18     | 91         | 1.09            | 0.9999999 | 97.71759 |
| GOTERM_BP_ALL      | GO:0044237~cellular metabolic process                                       | 58         | 47.54 | 0.24     | 91         | 1.08            | 1         | 99.45021 |
| GOTERM_BP_ALL      | GO:0008152~metabolic process                                                | 60         | 49.18 | 0.52     | 91         | 1.01            | 1         | 99.99989 |
| Functional Group 2 | Median: 0.03618327017494709                                                 | Geo:0.02   |       |          |            |                 |           |          |
| GOTERM_BP_ALL      | GO:0007243~protein kinase cascade                                           | 13         | 10.66 | 0.00     | 91         | 3.42            | 0.1094739 | 0.592481 |
| GOTERM_BP_ALL      | GO:0007249~I-kappaB kinase/NF-kappaB cascade                                | 5          | 4.10  | 0.03     | 91         | 4.36            | 0.9934518 | 38.86154 |
| GOTERM_BP_ALL      | GO:0043123~positive regulation of I-kappaB kinase/NF-kappaB cascade         | 4          | 3.28  | 0.03     | 91         | 5.49            | 0.9977434 | 47.9547  |
| GOTERM_BP_ALL      | GO:0009966~regulation of signal transduction                                | 9          | 7.38  | 0.04     | 91         | 2.31            | 0.9972948 | 51.14291 |
| GOTERM_BP_ALL      | GO:0009967~positive regulation of signal transduction                       | 5          | 4.10  | 0.04     | 91         | 3.81            | 0.9970107 | 53.15564 |
| GOTERM_BP_ALL      | GO:0043122~regulation of I-kappaB kinase/NF-kappaB cascade                  | 4          | 3.28  | 0.04     | 91         | 5.11            | 0.9964362 | 54.52181 |
| Functional Group 3 | Median: 0.06870726602237465                                                 | Geo:0.08   |       |          |            |                 |           |          |
| GOTERM_BP_ALL      | GO:0000278~mitotic cell cycle                                               | 8          | 6.56  | 0.01     | 91         | 3.25            | 0.9139941 | 17.66118 |
| GOTERM_BP_ALL      | GO:0022403~cell cycle phase                                                 | 8          | 6.56  | 0.02     | 91         | 2.97            | 0.9705053 | 26.79692 |
| GOTERM_BP_ALL      | GO:0007049~cell cycle                                                       | 14         | 11.48 | 0.02     | 91         | 1.99            | 0.9814067 | 31.01961 |
| GOTERM_BP_ALL      | GO:0051329~interphase of mitotic cell cycle                                 | 4          | 3.28  | 0.03     | 91         | 5.49            | 0.9977434 | 47.9547  |
| GOTERM_BP_ALL      | GO:0008284~positive regulation of cell proliferation                        | 6          | 4.92  | 0.04     | 91         | 3.20            | 0.9976734 | 50.65269 |
| GOTERM_BP_ALL      | GO:0051325~interphase                                                       | 4          | 3.28  | 0.04     | 91         | 5.11            | 0.9964362 | 54.52181 |
| GOTERM_BP_ALL      | GO:0000082~G1/S transition of mitotic cell cycle                            | 3          | 2.46  | 0.04     | 91         | 8.67            | 0.9973068 | 57.45713 |
| GOTERM_BP_ALL      | GO:0022402~cell cycle process                                               | 11         | 9.02  | 0.06     | 91         | 1.88            | 0.9995853 | 69.80455 |
| GOTERM_BP_ALL      | GO:0042127~regulation of cell proliferation                                 | 8          | 6.56  | 0.07     | 91         | 2.14            | 0.9998218 | 76.4969  |
| GOTERM_BP_ALL      | GO:0008283~cell proliferation                                               | 11         | 9.02  | 0.08     | 91         | 1.81            | 0.999798  | 76.93027 |
| GOTERM_BP_ALL      | GO:0007067~mitosis                                                          | 4          | 3.28  | 0.24     | 91         | 2.34            | 1         | 99.37814 |
| GOTERM_BP_ALL      | GO:0000087~M phase of mitotic cell cycle                                    | 4          | 3.28  | 0.24     | 91         | 2.31            | 1         | 99.44754 |
| GOTERM_BP_ALL      | GO:0051301~cell division                                                    | 4          | 3.28  | 0.34     | 91         | 1.91            | 1         | 99.95896 |
| GOTERM_BP_ALL      | GO:0000279~M phase                                                          | 4          | 3.28  | 0.36     | 91         | 1.85            | 1         | 99.97679 |
| GOTERM_BP_ALL      | GO:0000074~regulation of progression through cell cycle                     | 6          | 4.92  | 0.41     | 91         | 1.41            | 1         | 99.99514 |
| GOTERM_BP_ALL      | GO:0051726~regulation of cell cycle                                         | 6          | 4.92  | 0.41     | 91         | 1.41            | 1         | 99.99514 |
| Functional Group 4 | Median: 0.1950304615867952                                                  | Geo:0.09   |       |          |            |                 |           |          |
| GOTERM_BP_ALL      | GO:0007169~transmembrane receptor protein tyrosine kinase signaling pathway | 7          | 5.74  | 0.01     | 91         | 4.00            | 0.8390106 | 12.72965 |

| Category           | Term                                                        | Count    | %     | P    | List Total | Fold Enrichment | Benjamini | FDR      |
|--------------------|-------------------------------------------------------------|----------|-------|------|------------|-----------------|-----------|----------|
| GOTERM_BP_ALL      | GO:0007167~enzyme linked receptor protein signaling pathway | 7        | 5.74  | 0.03 | 91         | 2.93            | 0.9959367 | 43.12843 |
| GOTERM_BP_ALL      | GO:0007166~cell surface receptor linked signal transduction | 11       | 9.02  | 0.36 | 91         | 1.26            | 1         | 99.97501 |
| GOTERM_BP_ALL      | GO:0007399~nervous system development                       | 3        | 2.46  | 0.95 | 91         | 0.65            | 1         | 100      |
| Functional Group 5 | Median: 0.10658407530061273                                 | Geo:0.12 |       |      |            |                 |           |          |
| GOTERM_BP_ALL      | GO:0046777~protein amino acid autophosphorylation           | 3        | 2.46  | 0.10 | 91         | 5.49            | 0.999975  | 86.12023 |
| GOTERM_BP_ALL      | GO:0016540~protein autoprocessing                           | 3        | 2.46  | 0.11 | 91         | 5.32            | 0.9999826 | 87.67668 |
| GOTERM_BP_ALL      | GO:0016485~protein processing                               | 3        | 2.46  | 0.18 | 91         | 3.83            | 1         | 97.5435  |
| Functional Group 6 | Median: 0.24535433349064537                                 | Geo:0.20 |       |      |            |                 |           |          |
| GOTERM_BP_ALL      | GO:0048522~positive regulation of cellular process          | 13       | 10.66 | 0.06 | 91         | 1.74            | 0.999531  | 70.30735 |
| GOTERM_BP_ALL      | GO:0048518~positive regulation of biological process        | 13       | 10.66 | 0.12 | 91         | 1.55            | 0.9999964 | 91.39775 |
| GOTERM_BP_ALL      | GO:0050794~regulation of cellular process                   | 31       | 25.41 | 0.25 | 91         | 1.15            | 1         | 99.4644  |
| GOTERM_BP_ALL      | GO:0050789~regulation of biological process                 | 32       | 26.23 | 0.36 | 91         | 1.09            | 1         | 99.97595 |
| GOTERM_BP_ALL      | GO:0065007~biological regulation                            | 34       | 27.87 | 0.47 | 91         | 1.04            | 1         | 99.99922 |
| Functional Group 7 | Median: 0.3228801660630666                                  | Geo:0.25 |       |      |            |                 |           |          |
| GOTERM_BP_ALL      | GO:0002521~leukocyte differentiation                        | 4        | 3.28  | 0.05 | 91         | 4.58            | 0.9990863 | 64.77437 |
| GOTERM_BP_ALL      | GO:0030097~hemopoiesis                                      | 5        | 4.10  | 0.07 | 91         | 3.12            | 0.9998273 | 75.65607 |
| GOTERM_BP_ALL      | GO:0048534~hemopoietic or lymphoid organ development        | 5        | 4.10  | 0.08 | 91         | 3.05            | 0.999804  | 77.94441 |
| GOTERM_BP_ALL      | GO:0002520~immune system development                        | 5        | 4.10  | 0.09 | 91         | 2.92            | 0.9999227 | 82.10186 |
| GOTERM_BP_ALL      | GO:0030099~myeloid cell differentiation                     | 3        | 2.46  | 0.17 | 91         | 4.02            | 0.9999999 | 96.7145  |
| GOTERM_BP_ALL      | GO:0048513~organ development                                | 11       | 9.02  | 0.27 | 91         | 1.37            | 1         | 99.68183 |
| GOTERM_BP_ALL      | GO:0032502~developmental process                            | 25       | 20.4% | 0.32 | 91         | 1.14            | 1         | 99.9285  |
| GOTERM_BP_ALL      | GO:0009887~organ morphogenesis                              | 4        | 3.28  | 0.44 | 91         | 1.64            | 1         | 99.99761 |
| GOTERM_BP_ALL      | GO:0007275~multicellular organismal development             | 16       | 13.11 | 0.48 | 91         | 1.09            | 1         | 99.99955 |
| GOTERM_BP_ALL      | GO:0048856~anatomical structure development                 | 14       | 11.48 | 0.59 | 91         | 1.04            | 1         | 99.99999 |
| GOTERM_BP_ALL      | GO:0048731~system development                               | 11       | 9.02  | 0.66 | 91         | 1.00            | 1         | 100      |
| GOTERM_BP_ALL      | GO:0002376~immune system process                            | 7        | 5.74  | 0.68 | 91         | 1.02            | 1         | 100      |
| GOTERM_BP_ALL      | GO:0032501~multicellular organismal process                 | 20       | 16.39 | 0.71 | 91         | 0.95            | 1         | 100      |
| Functional Group 8 | Median: 0.25872590709365667                                 | Geo:0.29 |       |      |            |                 |           |          |
| GOTERM_BP_ALL      | GO:0030001~metal ion transport                              | 5        | 4.10  | 0.19 | 91         | 2.20            | 0.9999999 | 97.8825  |
| GOTERM_BP_ALL      | GO:0015672~monovalent inorganic cation transport            | 4        | 3.28  | 0.22 | 91         | 2.41            | 1         | 99.11936 |
| GOTERM_BP_ALL      | GO:0006812~cation transport                                 | 5        | 4.10  | 0.29 | 91         | 1.81            | 1         | 99.83872 |
| GOTERM_BP_ALL      | GO:0006811~ion transport                                    | 5        | 4.10  | 0.61 | 91         | 1.18            | 1         | 100      |
| Functional Group 9 | Median: 0.3228801660630666                                  | Geo:0.34 |       |      |            |                 |           |          |
| GOTERM_BP_ALL      | GO:0048869~cellular developmental process                   | 17       | 13.93 | 0.18 | 91         | 1.34            | 1         | 97.61175 |
| GOTERM_BP_ALL      | GO:0030154~cell differentiation                             | 17       | 13.93 | 0.18 | 91         | 1.34            | 1         | 97.61175 |
| GOTERM_BP_ALL      | GO:0006915~apoptosis                                        | 10       | 8.20  | 0.22 | 91         | 1.48            | 1         | 99.06249 |
| GOTERM_BP_ALL      | GO:0012501~programmed cell death                            | 10       | 8.20  | 0.23 | 91         | 1.47            | 1         | 99.15999 |
| GOTERM_BP_ALL      | GO:0008219~cell death                                       | 10       | 8.20  | 0.26 | 91         | 1.42            | 1         | 99.62713 |
| GOTERM_BP_ALL      | GO:0016265~death                                            | 10       | 8.20  | 0.26 | 91         | 1.42            | 1         | 99.62713 |
| GOTERM_BP_ALL      | GO:0048513~organ development                                | 11       | 9.02  | 0.27 | 91         | 1.37            | 1         | 99.68183 |
| GOTERM_BP_ALL      | GO:0032502~developmental process                            | 25       | 20.49 | 0.32 | 91         | 1.14            | 1         | 99.9285  |
| GOTERM_BP_ALL      | GO:0042981~regulation of apoptosis                          | 7        | 5.74  | 0.32 | 91         | 1.48            | 1         | 99.92881 |
| GOTERM_BP_ALL      | GO:0043067~regulation of programmed cell death              | 7        | 5.74  | 0.33 | 91         | 1.47            | 1         | 99.94043 |
| GOTERM_BP_ALL      | GO:0048468~cell development                                 | 10       | 8.20  | 0.56 | 91         | 1.09            | 1         | 99.99998 |

| Category            | Term                                                      | Count    | %     | <i>P</i> | List Total | Fold Enrichment | Benjamini | FDR      |
|---------------------|-----------------------------------------------------------|----------|-------|----------|------------|-----------------|-----------|----------|
| GOTERM_BP_ALL       | GO:0048523~negative regulation of cellular process        | 9        | 7.38  | 0.58     | 91         | 1.09            | 1         | 99.99999 |
| GOTERM_BP_ALL       | GO:0048856~anatomical structure development               | 14       | 11.48 | 0.59     | 91         | 1.04            | 1         | 99.99999 |
| GOTERM_BP_ALL       | GO:0048519~negative regulation of biological process      | 9        | 7.38  | 0.63     | 91         | 1.05            | 1         | 100      |
| GOTERM_BP_ALL       | GO:0048731~system development                             | 11       | 9.02  | 0.66     | 91         | 1.00            | 1         | 100      |
| Functional Group 10 | Median: 0.3303788461948379                                | Geo:0.38 |       |          |            |                 |           |          |
| GOTERM_BP_ALL       | GO:0065009~regulation of a molecular function             | 8        | 6.56  | 0.15     | 91         | 1.79            | 0.9999998 | 95.44414 |
| GOTERM_BP_ALL       | GO:0050790~regulation of catalytic activity               | 7        | 5.74  | 0.19     | 91         | 1.79            | 0.9999999 | 97.9909  |
| GOTERM_BP_ALL       | GO:0045860~positive regulation of protein kinase activity | 3        | 2.46  | 0.31     | 91         | 2.66            | 1         | 99.89175 |
| GOTERM_BP_ALL       | GO:0045859~regulation of protein kinase activity          | 4        | 3.28  | 0.32     | 91         | 2.00            | 1         | 99.91818 |
| GOTERM_BP_ALL       | GO:0033674~positive regulation of kinase activity         | 3        | 2.46  | 0.32     | 91         | 2.57            | 1         | 99.9246  |
| GOTERM_BP_ALL       | GO:0051347~positive regulation of transferase activity    | 3        | 2.46  | 0.33     | 91         | 2.53            | 1         | 99.9372  |
| GOTERM_BP_ALL       | GO:0043549~regulation of kinase activity                  | 4        | 3.28  | 0.33     | 91         | 1.96            | 1         | 99.93772 |
| GOTERM_BP_ALL       | GO:0051338~regulation of transferase activity             | 4        | 3.28  | 0.33     | 91         | 1.94            | 1         | 99.94575 |
| GOTERM_BP_ALL       | GO:0000165~MAPKKK cascade                                 | 3        | 2.46  | 0.46     | 91         | 1.94            | 1         | 99.99875 |
| GOTERM_BP_ALL       | GO:0051336~regulation of hydrolase activity               | 3        | 2.46  | 0.46     | 91         | 1.94            | 1         | 99.99875 |
| GOTERM_BP_ALL       | GO:0007010~cytoskeleton organization and biogenesis       | 5        | 4.10  | 0.48     | 91         | 1.38            | 1         | 99.99955 |
| GOTERM_BP_ALL       | GO:0043085~positive regulation of catalytic activity      | 3        | 2.46  | 0.58     | 91         | 1.54            | 1         | 99.99999 |
| GOTERM_BP_ALL       | GO:0006996~organelle organization and biogenesis          | 7        | 5.74  | 0.82     | 91         | 0.87            | 1         | 100      |
| GOTERM_BP_ALL       | GO:0065008~regulation of biological quality               | 3        | 2.46  | 0.99     | 91         | 0.50            | 1         | 100      |
| Functional Group 11 | Median: 0.4069864585039749                                | Geo:0.41 |       |          |            |                 |           |          |
| GOTERM_BP_ALL       | GO:0009607~response to biotic stimulus                    | 4        | 3.28  | 0.38     | 91         | 1.79            | 1         | 99.98708 |
| GOTERM_BP_ALL       | GO:0051704~multi-organism process                         | 4        | 3.28  | 0.41     | 91         | 1.72            | 1         | 99.99392 |
| GOTERM_BP_ALL       | GO:0051707~response to other organism                     | 3        | 2.46  | 0.43     | 91         | 2.03            | 1         | 99.99716 |
| Functional Group 12 | Median: 0.5829067038411142                                | Geo:0.53 |       |          |            |                 |           |          |
| GOTERM_BP_ALL       | GO:0042981~regulation of apoptosis                        | 7        | 5.74  | 0.32     | 91         | 1.48            | 1         | 99.92881 |
| GOTERM_BP_ALL       | GO:0043067~regulation of programmed cell death            | 7        | 5.74  | 0.33     | 91         | 1.47            | 1         | 99.94043 |
| GOTERM_BP_ALL       | GO:0006916~anti-apoptosis                                 | 3        | 2.46  | 0.49     | 91         | 1.83            | 1         | 99.99956 |
| GOTERM_BP_ALL       | GO:0006917~induction of apoptosis                         | 3        | 2.46  | 0.53     | 91         | 1.70            | 1         | 99.99999 |
| GOTERM_BP_ALL       | GO:0012502~induction of programmed cell death             | 3        | 2.46  | 0.53     | 91         | 1.70            | 1         | 99.99999 |
| GOTERM_BP_ALL       | GO:0048523~negative regulation of cellular process        | 9        | 7.38  | 0.58     | 91         | 1.09            | 1         | 99.99999 |
| GOTERM_BP_ALL       | GO:0043065~positive regulation of apoptosis               | 3        | 2.46  | 0.61     | 91         | 1.45            | 1         | 100      |
| GOTERM_BP_ALL       | GO:0043068~positive regulation of programmed cell death   | 3        | 2.46  | 0.62     | 91         | 1.43            | 1         | 100      |
| GOTERM_BP_ALL       | GO:0048519~negative regulation of biological process      | 9        | 7.38  | 0.63     | 91         | 1.05            | 1         | 100      |
| GOTERM_BP_ALL       | GO:0043066~negative regulation of apoptosis               | 3        | 2.46  | 0.66     | 91         | 1.33            | 1         | 100      |
| GOTERM_BP_ALL       | GO:0043069~negative regulation of programmed cell death   | 3        | 2.46  | 0.66     | 91         | 1.32            | 1         | 100      |
| Functional Group 13 | Median: 0.5424209679924756                                | Geo:0.57 |       |          |            |                 |           |          |
| GOTERM_BP_ALL       | GO:0051179~localization                                   | 23       | 18.85 | 0.32     | 91         | 1.15            | 1         | 99.92665 |
| GOTERM_BP_ALL       | GO:0006810~transport                                      | 19       | 15.57 | 0.42     | 91         | 1.11            | 1         | 99.99594 |
| GOTERM_BP_ALL       | GO:0008104~protein localization                           | 8        | 6.56  | 0.47     | 91         | 1.22            | 1         | 99.99928 |
| GOTERM_BP_ALL       | GO:0051234~establishment of localization                  | 19       | 15.57 | 0.49     | 91         | 1.07            | 1         | 99.99996 |
| GOTERM_BP_ALL       | GO:0033036~macromolecule localization                     | 8        | 6.56  | 0.53     | 91         | 1.16            | 1         | 99.99991 |

| Category            | Term                                                                                           | Count    | %     | <i>P</i> | List Total | Fold Enrichment | Benjamini | FDR      |
|---------------------|------------------------------------------------------------------------------------------------|----------|-------|----------|------------|-----------------|-----------|----------|
| GOTERM_BP_ALL       | GO:0006605~protein targeting                                                                   | 3        | 2.46  | 0.54     | 91         | 1.66            | 1         | 99.99994 |
| GOTERM_BP_ALL       | GO:0015031~protein transport                                                                   | 7        | 5.74  | 0.54     | 91         | 1.18            | 1         | 99.99995 |
| GOTERM_BP_ALL       | GO:0045184~establishment of protein localization                                               | 7        | 5.74  | 0.60     | 91         | 1.11            | 1         | 100      |
| GOTERM_BP_ALL       | GO:0046907~intracellular transport                                                             | 6        | 4.92  | 0.64     | 91         | 1.10            | 1         | 100      |
| GOTERM_BP_ALL       | GO:0006886~intracellular protein transport                                                     | 4        | 3.28  | 0.65     | 91         | 1.20            | 1         | 100      |
| GOTERM_BP_ALL       | GO:0051649~establishment of cellular localization                                              | 6        | 4.92  | 0.82     | 91         | 0.88            | 1         | 100      |
| GOTERM_BP_ALL       | GO:0051641~cellular localization                                                               | 6        | 4.92  | 0.83     | 91         | 0.86            | 1         | 100      |
| GOTERM_BP_ALL       | GO:0016043~cellular component organization and biogenesis                                      | 15       | 12.30 | 0.92     | 91         | 0.80            | 1         | 100      |
| Functional Group 14 | Median: 0.7128814799700762                                                                     | Geo:0.58 |       |          |            |                 |           |          |
| GOTERM_BP_ALL       | GO:0009057~macromolecule catabolic process                                                     | 5        | 4.10  | 0.38     | 91         | 1.60            | 1         | 99.98387 |
| GOTERM_BP_ALL       | GO:0043285~biopolymer catabolic process                                                        | 4        | 3.28  | 0.43     | 91         | 1.66            | 1         | 99.99672 |
| GOTERM_BP_ALL       | GO:0044265~cellular macromolecule catabolic process                                            | 3        | 2.46  | 0.71     | 91         | 1.20            | 1         | 100      |
| GOTERM_BP_ALL       | GO:0009056~catabolic process                                                                   | 5        | 4.10  | 0.74     | 91         | 1.00            | 1         | 100      |
| GOTERM_BP_ALL       | GO:0044248~cellular catabolic process                                                          | 4        | 3.28  | 0.78     | 91         | 0.97            | 1         | 100      |
| Functional Group 15 | Median: 0.8866617747985455                                                                     | Geo:0.84 |       |          |            |                 |           |          |
| GOTERM_BP_ALL       | GO:0002376~immune system process                                                               | 7        | 5.74  | 0.68     | 91         | 1.02            | 1         | 100      |
| GOTERM_BP_ALL       | GO:0006955~immune response                                                                     | 4        | 3.28  | 0.89     | 91         | 0.79            | 1         | 100      |
| GOTERM_BP_ALL       | GO:0050896~response to stimulus                                                                | 11       | 9.02  | 0.98     | 91         | 0.65            | 1         | 100      |
| Functional Group 16 | Median: 0.9581775686879237                                                                     | Geo:0.91 |       |          |            |                 |           |          |
| GOTERM_BP_ALL       | GO:0006357~regulation of transcription from RNA polymerase II promoter                         | 4        | 3.28  | 0.55     | 91         | 1.39            | 1         | 99.99996 |
| GOTERM_BP_ALL       | GO:0006366~transcription from RNA polymerase II promoter                                       | 4        | 3.28  | 0.79     | 91         | 0.96            | 1         | 100      |
| GOTERM_BP_ALL       | GO:0019222~regulation of metabolic process                                                     | 12       | 9.84  | 0.93     | 91         | 0.75            | 1         | 100      |
| GOTERM_BP_ALL       | GO:0031323~regulation of cellular metabolic process                                            | 11       | 9.02  | 0.95     | 91         | 0.73            | 1         | 100      |
| GOTERM_BP_ALL       | GO:0045449~regulation of transcription                                                         | 9        | 7.38  | 0.95     | 91         | 0.71            | 1         | 100      |
| GOTERM_BP_ALL       | GO:0010468~regulation of gene expression                                                       | 10       | 8.20  | 0.95     | 91         | 0.72            | 1         | 100      |
| GOTERM_BP_ALL       | GO:0006355~regulation of transcription, DNA-dependent                                          | 8        | 6.56  | 0.95     | 91         | 0.69            | 1         | 100      |
| GOTERM_BP_ALL       | GO:0019219~regulation of nucleobase, nucleoside, nucleotide and nucleic acid metabolic process | 9        | 7.38  | 0.96     | 91         | 0.68            | 1         | 100      |
| GOTERM_BP_ALL       | GO:0006351~transcription, DNA-dependent                                                        | 8        | 6.56  | 0.96     | 91         | 0.67            | 1         | 100      |
| GOTERM_BP_ALL       | GO:0032774~RNA biosynthetic process                                                            | 8        | 6.56  | 0.96     | 91         | 0.67            | 1         | 100      |
| GOTERM_BP_ALL       | GO:0006350~transcription                                                                       | 9        | 7.38  | 0.97     | 91         | 0.67            | 1         | 100      |
| GOTERM_BP_ALL       | GO:0016070~RNA metabolic process                                                               | 10       | 8.20  | 0.99     | 91         | 0.61            | 1         | 100      |
| GOTERM_BP_ALL       | GO:0010467~gene expression                                                                     | 13       | 10.66 | 0.99     | 91         | 0.62            | 1         | 100      |
| GOTERM_BP_ALL       | GO:0006139~nucleobase, nucleoside, nucleotide and nucleic acid metabolic process               | 13       | 10.66 | 1.00     | 91         | 0.56            | 1         | 100      |
| Functional Group 17 | Median: 0.9751231848048691                                                                     | Geo:0.97 |       |          |            |                 |           |          |
| GOTERM_BP_ALL       | GO:0006412~translation                                                                         | 3        | 2.46  | 0.92     | 91         | 0.72            | 1         | 100      |
| GOTERM_BP_ALL       | GO:0009059~macromolecule biosynthetic process                                                  | 4        | 3.28  | 0.95     | 91         | 0.63            | 1         | 100      |
| GOTERM_BP_ALL       | GO:0009058~biosynthetic process                                                                | 5        | 4.10  | 1.00     | 91         | 0.47            | 1         | 100      |
| GOTERM_BP_ALL       | GO:0044249~cellular biosynthetic process                                                       | 3        | 2.46  | 1.00     | 91         | 0.38            | 1         | 10       |

The analysis was done with "custom" classification stringency and the Biological Process (BP\_ALL) gene ontology term.
